# Supplementary material
Source: HighWire-hosted journal article supplement (http://jpet.aspetjournals.org/highwire/filestream/156486/field_highwire_adjunct_files/3/2330_supp_table.pdf)
Supplement: 2330_supp_table.pdf [file 2330_supp_table.pdf]

# **CH6824025, potent and selective DDR1 inhibitor, reduces kidney fibrosis in UUO mice**

## **Names of authors**

Yukari Yasui, Takeshi Murata, Yoshinori Tsuboi, Atsuko Murai, Naoshi Horiba

Research Division, Chugai Pharmaceutical Co., Ltd., Yokohama city, Kanagawa, Japan. (Y.Y., T.M., Y.T., N.H.)

Translational Research Division, Chugai Pharmaceutical Co., Ltd., Yokohama city, Kanagawa, Japan. (A.M.)

The Journal of Pharmacology and Experimental Therapeutics

JPET-AR-2024-002330

**A**

| GeneID        | LOG2FC Vehicle vs 200 mg/kg | pValue  |
|---------------|-----------------------------|---------|
| Calb1         | 1.764552444                 | 0.02956 |
| Spp2          | 1.364416902                 | 0.01270 |
| Per2          | 1.255077133                 | 0.01166 |
| Ptger3        | 1.249489811                 | 0.01359 |
| Slc34a3       | 1.163660232                 | 0.02909 |
| Fabp3         | 1.117383053                 | 0.00940 |
| Cox7a1        | 1.094389761                 | 0.02626 |
| Gpx6          | 1.0906129                   | 0.04028 |
| Gatm          | 1.066429923                 | 0.00334 |
| Chrna4        | 1.03188503                  | 0.01366 |
| Sostdc1       | 1.027444663                 | 0.01256 |
| Uroc1         | 1.016474906                 | 0.04532 |
| Slc5a2        | 1.009688821                 | 0.04148 |
| Klk1          | 0.994004546                 | 0.00838 |
| Tmem37        | 0.991051478                 | 0.00397 |
| Mfsd4a        | 0.972221237                 | 0.03756 |
| Atp5g1        | 0.968455697                 | 0.00021 |
| Ptgfr         | 0.955415725                 | 0.02937 |
| Hsd3b2        | 0.954384659                 | 0.01569 |
| Slc16a5       | 0.869044858                 | 0.01260 |
| Ppp1r1a       | 0.85589983                  | 0.03727 |
| Hlf           | 0.842433709                 | 0.03156 |
| Nol3          | 0.838198112                 | 0.01464 |
| Kcnt1         | 0.829788613                 | 0.02004 |
| Scd1          | 0.82133441                  | 0.01625 |
| Hsd17b14      | 0.811519827                 | 0.00543 |
| Osgin1        | 0.806013066                 | 0.00790 |
| Alas1         | 0.757539189                 | 0.02051 |
| Snca          | 0.752360931                 | 0.00086 |
| Dpp7          | 0.748610262                 | 0.03001 |
| Prodh2        | 0.727940122                 | 0.04699 |
| Chchd10       | 0.72276081                  | 0.01543 |
| Alas2         | 0.722745443                 | 0.00852 |
| Ldlr          | 0.720974324                 | 0.03299 |
| Rap1gap2      | 0.720451573                 | 0.02600 |
| Ftl1-ps1      | 0.718916136                 | 0.00356 |
| Tmed6         | 0.70819408                  | 0.01497 |
| Slc2a2        | 0.703306279                 | 0.03960 |
| Rph3a         | 0.699960354                 | 0.04314 |
| Fxyd2         | 0.699115684                 | 0.01042 |
| Car15         | 0.697617394                 | 0.04554 |
| Bpnt1         | 0.695528017                 | 0.03750 |
| Got1          | 0.684223222                 | 0.02791 |
| Isoc2a        | 0.678001134                 | 0.01670 |
| 1700028J19Rik | 0.676350656                 | 0.04060 |
| Atp5f1        | 0.667588993                 | 0.01876 |
| Tmem151a      | 0.665239083                 | 0.01021 |
| Gcat          | 0.655094282                 | 0.03327 |
| Hmgcr         | 0.651867221                 | 0.02542 |
| Pim3          | 0.643913208                 | 0.01778 |

**B**

| GeneID   | LOG2FC Vehicle vs 200 mg/kg | pValue    |
|----------|-----------------------------|-----------|
| Igfbp2   | -3.17134207                 | 3.488E-05 |
| Dio2     | -2.450456695                | 0.0030    |
| Fbn2     | -1.829747519                | 0.0001    |
| Fcgbp    | -1.627690547                | 0.0130    |
| Mgl2     | -1.442958852                | 0.0007    |
| Apcdd1   | -1.349505294                | 0.0009    |
| Bcl6     | -1.334579408                | 0.0487    |
| Fndc1    | -1.320896234                | 0.0060    |
| Alx1     | -1.276170555                | 0.0049    |
| Sbspon   | -1.241036667                | 0.0059    |
| Spock3   | -1.231780171                | 0.0476    |
| Glipr2   | -1.217840221                | 0.0196    |
| Mxra8    | -1.212318911                | 0.0064    |
| Htr2b    | -1.178151155                | 0.0096    |
| Cd209a   | -1.173934641                | 0.0215    |
| Nrep     | -1.172618184                | 0.0040    |
| Ros1     | -1.167875261                | 0.0058    |
| Tnfrsf19 | -1.166948062                | 0.0003    |
| Tagln    | -1.165167672                | 0.0277    |
| Ptgs2    | -1.135560301                | 0.0003    |
| Wnt4     | -1.132036472                | 0.0091    |
| Cdh11    | -1.11142357                 | 0.0064    |
| Ccr2     | -1.100304181                | 0.0180    |
| Crlf1    | -1.092599379                | 0.0163    |
| Pde2a    | -1.088508423                | 0.0019    |
| Aox3     | -1.058711326                | 0.0038    |
| Trp53i11 | -1.039006581                | 0.0021    |
| Oasl2    | -1.025925366                | 0.0014    |
| Plat     | -1.0250561                  | 0.0109    |
| Robo3    | -1.013306687                | 0.0037    |
| Col3a1   | -1.012825273                | 0.0139    |
| Rnase6   | -1.007173894                | 0.0020    |
| Ramp1    | -1.004878438                | 0.0113    |
| Ltbp2    | -0.994300976                | 0.0071    |
| Mmd      | -0.982140361                | 0.0012    |
| Inhbb    | -0.97678125                 | 0.0220    |
| Ptn      | -0.964845054                | 0.0060    |
| Vgll3    | -0.950470258                | 0.0084    |
| Gjb5     | -0.94665546                 | 0.0007    |
| Col5a3   | -0.945402892                | 0.0060    |
| Ncam1    | -0.940795371                | 0.0137    |
| Npy1r    | -0.935284215                | 0.0474    |
| Cpxm1    | -0.934721727                | 0.0172    |
| Cd209c   | -0.930119884                | 0.0008    |
| Ccl17    | -0.912418538                | 0.0007    |
| Hs6st2   | -0.900437103                | 0.0202    |
| Dpt      | -0.887814534                | 0.0440    |
| Adgra1   | -0.883176967                | 0.0181    |
| Prss35   | -0.882008285                | 0.0006    |
| Adamts12 | -0.881115849                | 0.0167    |

Supplemental Table 1. The list of the top 50 upregulated genes (**A**) and the top 50 downregulated genes (**B**) in CH6824025 group compared to Vehicle.
